# Supplementary material for: Modified Triglyceride-Glucose Indices for Mortality Prediction in Cardiovascular Disease Patients with diabetes or pre-diabetes: Analysis of NHANES 1999-2018
Source: Research Square preprint supplement (doi:10.21203/rs.3.rs-6267888/v1), 2025-04-15
Supplement: Supplementary file 1 [file 311340da31f7bbce087bb181.docx]

Table S1

a

| TYG | 0 | 1 | 2 | 3 | P-value |
| --- | --- | --- | --- | --- | --- |
| N | 476 | 475 | 478 | 475 |  |
| Age,years, mean(SD) | 68.25 ± 11.53 | 67.97 ± 11.51 | 67.54 ± 11.36 | 65.91 ± 11.39 | 0.008 |
| Gender, n (%) |  |  |  |  | 0.701 |
| Male | 277 (58.19%) | 268 (56.42%) | 277 (57.95%) | 286 (60.21%) |  |
| Female | 199 (41.81%) | 207 (43.58%) | 201 (42.05%) | 189 (39.79%) |  |
| Race, n (%) |  |  |  |  | <0.001 |
| Mexican American | 31 (6.51%) | 47 (9.89%) | 63 (13.18%) | 81 (17.05%) |  |
| Other Hispanic | 37 (7.77%) | 41 (8.63%) | 31 (6.49%) | 36 (7.58%) |  |
| Non-Hispanic White | 229 (48.11%) | 254 (53.47%) | 273 (57.11%) | 268 (56.42%) |  |
| Non-Hispanic Black | 145 (30.46%) | 98 (20.63%) | 83 (17.36%) | 68 (14.32%) |  |
| Other Race - Including Multi-Racial | 34 (7.14%) | 35 (7.37%) | 28 (5.86%) | 22 (4.63%) |  |
| Education, n (%) |  |  |  |  | 0.063 |
| Less than 9th grade | 60 (12.61%) | 83 (17.47%) | 79 (16.53%) | 101 (21.26%) |  |
| 9-11th grade | 91 (19.12%) | 89 (18.74%) | 82 (17.15%) | 97 (20.42%) |  |
| High school graduate/GED or equivalent | 107 (22.48%) | 108 (22.74%) | 120 (25.10%) | 117 (24.63%) |  |
| Some college or AA degree | 130 (27.31%) | 118 (24.84%) | 123 (25.73%) | 109 (22.95%) |  |
| College graduate or above | 86 (18.07%) | 76 (16.00%) | 72 (15.06%) | 48 (10.11%) |  |
| Refused | 1 (0.21%) | 1 (0.21%) | 1 (0.21%) | 1 (0.21%) |  |
| Don't know | 1 (0.21%) | 0 (0.00%) | 1 (0.21%) | 2 (0.42%) |  |
| Marry, n (%) |  |  |  |  | 0.107 |
| Married | 241 (50.63%) | 257 (54.22%) | 269 (56.63%) | 267 (56.45%) |  |
| Widowed | 107 (22.48%) | 94 (19.83%) | 87 (18.32%) | 90 (19.03%) |  |
| Divorced | 58 (12.18%) | 67 (14.14%) | 75 (15.79%) | 61 (12.90%) |  |
| Separated | 22 (4.62%) | 11 (2.32%) | 14 (2.95%) | 8 (1.69%) |  |
| Never married | 28 (5.88%) | 26 (5.49%) | 18 (3.79%) | 33 (6.98%) |  |
| Living with partner | 20 (4.20%) | 19 (4.01%) | 12 (2.53%) | 14 (2.96%) |  |
| BMI |  |  |  |  | <0.001 |
| <24 | 97 (20.38%) | 65 (13.68%) | 49 (10.25%) | 34 (7.16%) |  |
| ≥24 | 379 (79.62%) | 410 (86.32%) | 429 (89.75%) | 441 (92.84%) |  |
| Smoked at least 100 cigarettes in their lifetime |  |  |  |  | 0.189 |
| Yes | 274 (57.56%) | 286 (60.21%) | 291 (60.88%) | 306 (64.42%) |  |
| No | 202 (42.44%) | 189 (39.79%) | 187 (39.12%) | 169 (35.58%) |  |
| Still smoking , n (%) |  |  |  |  | 0.416 |
| Every day | 79 (28.83%) | 92 (32.17%) | 78 (26.80%) | 82 (26.80%) |  |
| Some days | 12 (4.38%) | 12 (4.20%) | 14 (4.81%) | 7 (2.29%) |  |
| Not at all | 183 (66.79%) | 182 (63.64%) | 199 (68.38%) | 217 (70.92%) |  |

b

| TYG_BMI | Q1 | Q2 | Q3 | Q4 | P-value |
| --- | --- | --- | --- | --- | --- |
| N | 476 | 476 | 476 | 476 |  |
| Age,years, mean(SD) | 70.17 ± 11.11 | 69.48 ± 10.90 | 67.49 ± 11.10 | 62.53 ± 11.24 | <0.001 |
| Gender, n (%) |  |  |  |  | <0.001 |
| Male | 291 (61.13%) | 296 (62.18%) | 291 (61.13%) | 230 (48.32%) |  |
| Female | 185 (38.87%) | 180 (37.82%) | 185 (38.87%) | 246 (51.68%) |  |
| Race, n (%) |  |  |  |  | <0.001 |
| Mexican American | 34 (7.14%) | 56 (11.76%) | 71 (14.92%) | 61 (12.82%) |  |
| Other Hispanic | 35 (7.35%) | 37 (7.77%) | 30 (6.30%) | 43 (9.03%) |  |
| Non-Hispanic White | 267 (56.09%) | 251 (52.73%) | 267 (56.09%) | 239 (50.21%) |  |
| Non-Hispanic Black | 85 (17.86%) | 110 (23.11%) | 86 (18.07%) | 113 (23.74%) |  |
| Other Race - Including Multi-Racial | 55 (11.55%) | 22 (4.62%) | 22 (4.62%) | 20 (4.20%) |  |
| Education, n (%) |  |  |  |  | 0.002 |
| Less than 9th grade | 68 (14.29%) | 82 (17.23%) | 94 (19.75%) | 79 (16.60%) |  |
| 9-11th grade | 82 (17.23%) | 91 (19.12%) | 88 (18.49%) | 98 (20.59%) |  |
| High school graduate/GED or equivalent | 99 (20.80%) | 117 (24.58%) | 117 (24.58%) | 119 (25.00%) |  |
| Some college or AA degree | 119 (25.00%) | 127 (26.68%) | 108 (22.69%) | 126 (26.47%) |  |
| College graduate or above | 103 (21.64%) | 58 (12.18%) | 68 (14.29%) | 53 (11.13%) |  |
| Refused | 2 (0.42%) | 1 (0.21%) | 0 (0.00%) | 1 (0.21%) |  |
| Don't know | 3 (0.63%) | 0 (0.00%) | 1 (0.21%) | 0 (0.00%) |  |
| Marry, n (%) |  |  |  |  | <0.001 |
| Married | 233 (49.26%) | 281 (59.16%) | 284 (59.92%) | 236 (49.58%) |  |
| Widowed | 116 (24.52%) | 105 (22.11%) | 79 (16.67%) | 78 (16.39%) |  |
| Divorced | 63 (13.32%) | 51 (10.74%) | 69 (14.56%) | 78 (16.39%) |  |
| Separated | 18 (3.81%) | 2 (0.42%) | 18 (3.80%) | 17 (3.57%) |  |
| Never married | 23 (4.86%) | 25 (5.26%) | 9 (1.90%) | 48 (10.08%) |  |
| Living with partner | 20 (4.23%) | 11 (2.32%) | 15 (3.16%) | 19 (3.99%) |  |
| BMI |  |  |  |  | <0.001 |
| <24 | 234 (49.16%) | 11 (2.31%) | 0 (0.00%) | 0 (0.00%) |  |
| ≥24 | 242 (50.84%) | 465 (97.69%) | 476 (100.00%) | 476 (100.00%) |  |
| Smoked at least 100 cigarettes in their lifetime |  |  |  |  | 0.467 |
| Yes | 277 (58.19%) | 289 (60.71%) | 301 (63.24%) | 290 (60.92%) |  |
| No | 199 (41.81%) | 187 (39.29%) | 175 (36.76%) | 186 (39.08%) |  |
| Still smoking , n (%) |  |  |  |  | 0.004 |
| Every day | 104 (37.55%) | 69 (23.88%) | 74 (24.58%) | 84 (28.97%) |  |
| Some days | 12 (4.33%) | 14 (4.84%) | 12 (3.99%) | 7 (2.41%) |  |
| Not at all | 161 (58.12%) | 206 (71.28%) | 215 (71.43%) | 199 (68.62%) |  |

c

| TYG_WHTR | Q1 | Q2 | Q3 | Q4 | P-value |
| --- | --- | --- | --- | --- | --- |
| N | 476 | 477 | 476 | 475 |  |
| Age,years, mean(SD) | 68.49 ± 11.56 | 69.02 ± 11.01 | 67.62 ± 11.65 | 64.54 ± 11.19 | <0.001 |
| Gender, n (%) |  |  |  |  | <0.001 |
| Male | 311 (65.34%) | 308 (64.57%) | 266 (55.88%) | 223 (46.95%) |  |
| Female | 165 (34.66%) | 169 (35.43%) | 210 (44.12%) | 252 (53.05%) |  |
| Race, n (%) |  |  |  |  | <0.001 |
| Mexican American | 34 (7.14%) | 51 (10.69%) | 64 (13.45%) | 73 (15.37%) |  |
| Other Hispanic | 27 (5.67%) | 40 (8.39%) | 35 (7.35%) | 43 (9.05%) |  |
| Non-Hispanic White | 256 (53.78%) | 252 (52.83%) | 263 (55.25%) | 253 (53.26%) |  |
| Non-Hispanic Black | 115 (24.16%) | 103 (21.59%) | 91 (19.12%) | 85 (17.89%) |  |
| Other Race - Including Multi-Racial | 44 (9.24%) | 31 (6.50%) | 23 (4.83%) | 21 (4.42%) |  |
| Education, n (%) |  |  |  |  | <0.001 |
| Less than 9th grade | 57 (11.97%) | 76 (15.93%) | 98 (20.59%) | 92 (19.37%) |  |
| 9-11th grade | 78 (16.39%) | 91 (19.08%) | 94 (19.75%) | 96 (20.21%) |  |
| High school graduate/GED or equivalent | 105 (22.06%) | 110 (23.06%) | 115 (24.16%) | 122 (25.68%) |  |
| Some college or AA degree | 127 (26.68%) | 122 (25.58%) | 113 (23.74%) | 118 (24.84%) |  |
| College graduate or above | 104 (21.85%) | 77 (16.14%) | 56 (11.76%) | 45 (9.47%) |  |
| Refused | 3 (0.63%) | 0 (0.00%) | 0 (0.00%) | 1 (0.21%) |  |
| Don't know | 2 (0.42%) | 1 (0.21%) | 0 (0.00%) | 1 (0.21%) |  |
| Marry, n (%) |  |  |  |  | 0.059 |
| Married | 256 (54.12%) | 282 (59.24%) | 259 (54.53%) | 237 (50.00%) |  |
| Widowed | 95 (20.08%) | 101 (21.22%) | 84 (17.68%) | 98 (20.68%) |  |
| Divorced | 61 (12.90%) | 51 (10.71%) | 78 (16.42%) | 71 (14.98%) |  |
| Separated | 16 (3.38%) | 7 (1.47%) | 16 (3.37%) | 16 (3.38%) |  |
| Never married | 23 (4.86%) | 22 (4.62%) | 24 (5.05%) | 36 (7.59%) |  |
| Living with partner | 22 (4.65%) | 13 (2.73%) | 14 (2.95%) | 16 (3.38%) |  |
| BMI, n (%) |  |  |  |  | <0.001 |
| <24 | 208 (43.70%) | 31 (6.50%) | 5 (1.05%) | 1 (0.21%) |  |
| ≥24 | 268 (56.30%) | 446 (93.50%) | 471 (98.95%) | 474 (99.79%) |  |
| Smoked at least 100 cigarettes in their lifetime |  |  |  |  | 0.623 |
| Yes | 281 (59.03%) | 286 (59.96%) | 300 (63.03%) | 290 (61.05%) |  |
| No | 195 (40.97%) | 191 (40.04%) | 176 (36.97%) | 185 (38.95%) |  |
| Still smoking, n (%) |  |  |  |  | 0.008 |
| Every day | 104 (37.01%) | 70 (24.48%) | 81 (27.00%) | 76 (26.21%) |  |
| Some days | 14 (4.98%) | 13 (4.55%) | 11 (3.67%) | 7 (2.41%) |  |
| Not at all | 163 (58.01%) | 203 (70.98%) | 208 (69.33%) | 207 (71.38%) |  |

Result: Mean+SD / N(%)
